# Supplementary material for: Assignment of Chinook Salmon (Oncorhynchus tshawytscha) Linkage Groups to Specific Chromosomes Reveals a Karyotype with Multiple Rearrangements of the Chromosome Arms of Rainbow Trout (Oncorhynchus mykiss)
Source: PubMed Central journal article supplement (PMC3852390; doi:10.1534/g3.113.008078), 2013-10-29
Supplement: supp_g3.113.008078_FigureS2.pdf [file supp_g3.113.008078_FigureS2.pdf]

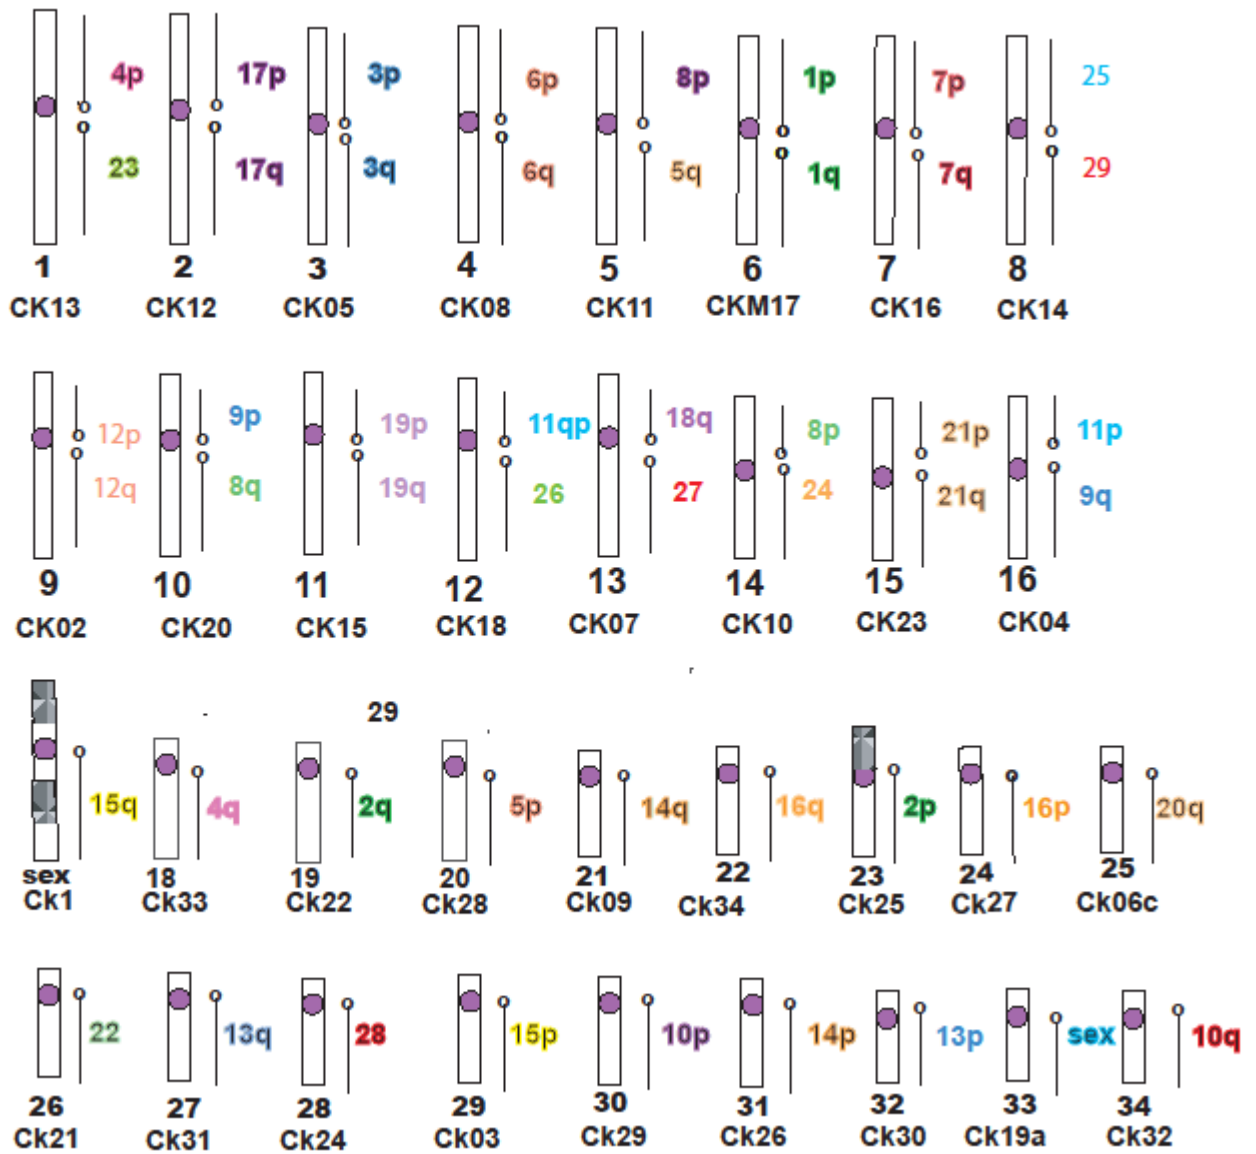

**Figure S2** Ideogram of the Chinook salmon karyotype showing location of rainbow trout chromosome arms.
